# Supplementary material for: Inhibitory Effect of Quercetin on Oxidative Endogen Enzymes: A Focus on Putative Binding Modes
Source: MDPI journal article supplement (doi:10.3390/ijms242015391), 2023-10-20
Supplement: s1 [file s1]

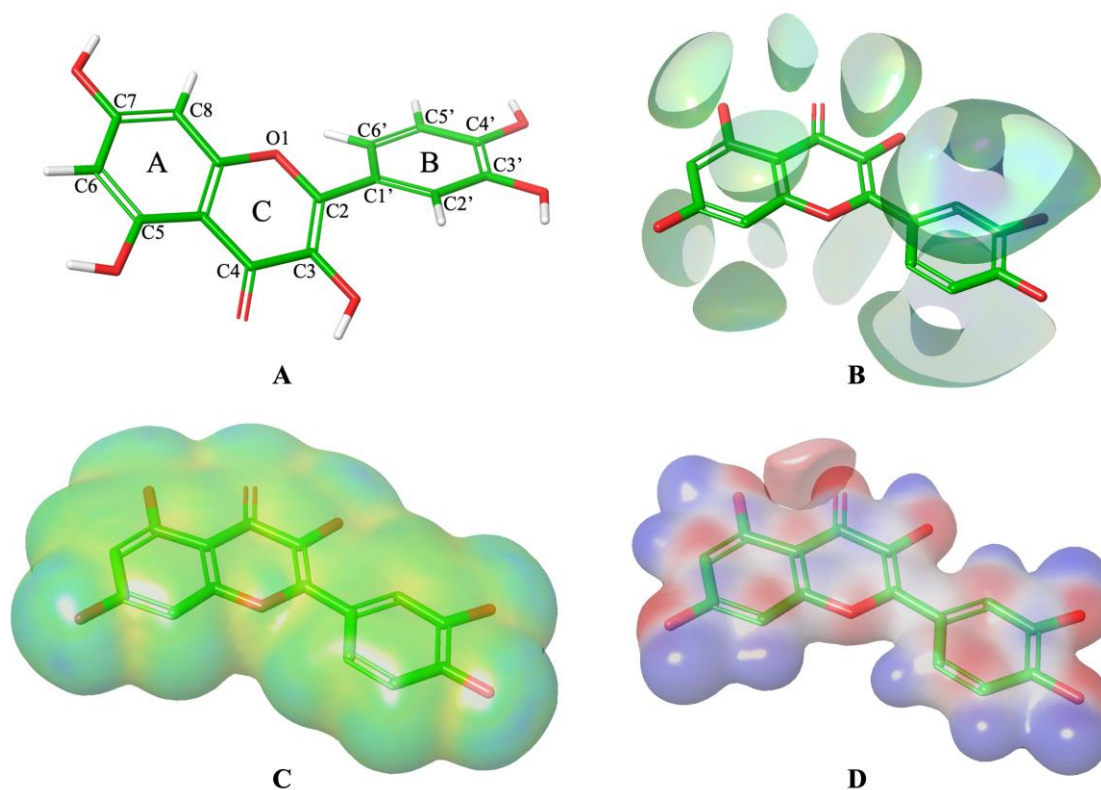

**Figure S1.** Optimized structure of Que (A), ALIE mapped molecular surface of Que (A), ED mapped molecular surface of Que (B), and ESP (C) mapped molecular surface of Que: red signifies electron-rich regions and blue indicates electron-poor zones.

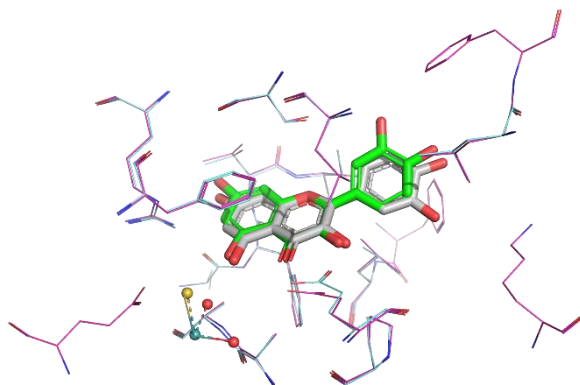

**Figure S2.** Superimposition of Que derived from the docking studies on XO (green sticks) over the native Que (grey sticks). Residues belonging to the binding sites are represented in lines, while the dioxothiomolybdenum(VI) ion is represented in small spheres.

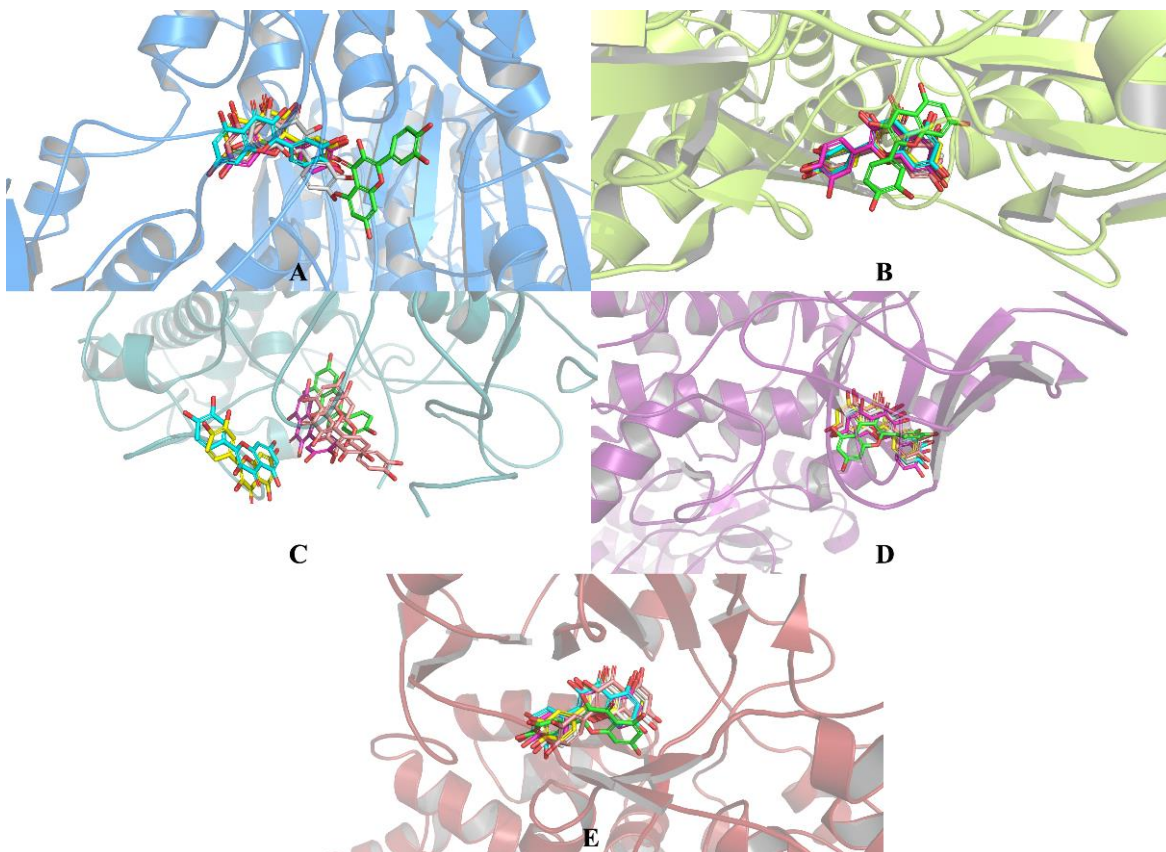

**Figure S3.** Results of the cluster analysis conducted on the MD trajectories of NOX (A), XO (B), MPO (C), 5-LOX (D), and MAO-A (E) aligned on the reference pose derived from docking studies on each enzyme. The chemical structures are colored as follows: reference docking pose (green), cluster 1 (cyan), cluster 2 (magenta), cluster 3 (yellow), cluster 4 (pink), and cluster 5 (grey).

**Table S1.** Que's calculated coordinates derived from DFT calculations: final geometry (A), bond length (B), bond angles (C), and torsional angles (D).

| (A) Final geometry |        |        |        |
|--------------------|--------|--------|--------|
| Atom               | X      | Y      | Z      |
| C1                 | -0.755 | 0.956  | -0.789 |
| C2                 | 0.033  | -0.029 | -0.280 |
| C3                 | -2.222 | 0.871  | -0.808 |
| C4                 | -2.790 | -0.344 | -0.247 |
| O5                 | -0.569 | -1.154 | 0.239  |
| C6                 | -1.912 | -1.319 | 0.260  |
| C7                 | -4.182 | -0.624 | -0.171 |
| C8                 | 1.492  | -0.085 | -0.192 |
| C9                 | -2.355 | -2.518 | 0.819  |
| C10                | -4.635 | -1.812 | 0.382  |
| C11                | 2.301  | 0.960  | -0.679 |
| C12                | 3.683  | 0.906  | -0.594 |
| O13                | -2.833 | 1.828  | -1.295 |
| C14                | -3.722 | -2.753 | 0.874  |
| C15                | 4.306  | -0.212 | -0.009 |
| C16                | 2.124  | -1.194 | 0.387  |

|     |        |        |        |
|-----|--------|--------|--------|
| O17 | -0.282 | 2.104  | -1.325 |
| C18 | 3.510  | -1.247 | 0.473  |
| O19 | -5.037 | 0.303  | -0.653 |
| O20 | 4.496  | 1.899  | -1.054 |
| O21 | 5.666  | -0.214 | 0.049  |
| O22 | -4.251 | -3.889 | 1.397  |
| H23 | -1.630 | -3.230 | 1.191  |
| H24 | -5.694 | -2.032 | 0.443  |
| H25 | 1.841  | 1.829  | -1.130 |
| H26 | 1.535  | -2.013 | 0.774  |
| H27 | -1.104 | 2.574  | -1.586 |
| H28 | 3.989  | -2.112 | 0.925  |
| H29 | -5.940 | -0.014 | -0.539 |
| H30 | 3.949  | 2.597  | -1.429 |
| H31 | 5.959  | -1.030 | 0.467  |
| H32 | -3.543 | -4.465 | 1.704  |

| (B) Bond length |      |      |       |
|-----------------|------|------|-------|
| Atoms           |      |      | Å     |
| C1              | -C2  | -C2  | 1.360 |
| C1              | -C3  | -C3  | 1.470 |
| C1              | -O17 | -O17 | 1.352 |
| C2              | -O5  | -O5  | 1.378 |
| C2              | -C8  | -C8  | 1.462 |
| C3              | -C4  | -C4  | 1.454 |
| C3              | -O13 | -O13 | 1.235 |
| C4              | -C6  | -C6  | 1.407 |
| C4              | -C7  | -C7  | 1.422 |
| O5              | -C6  | -C6  | 1.353 |
| C6              | -C9  | -C9  | 1.395 |
| C7              | -C10 | -C10 | 1.386 |
| C7              | -O19 | -O19 | 1.350 |
| C8              | -C11 | -C11 | 1.409 |
| C8              | -C16 | -C16 | 1.402 |
| C9              | -C14 | -C14 | 1.388 |
| C9              | -H23 | -H23 | 1.083 |
| C10             | -C14 | -C14 | 1.401 |
| C10             | -H24 | -H24 | 1.084 |
| C11             | -C12 | -C12 | 1.386 |
| C11             | -H25 | -H25 | 1.081 |
| C12             | -C15 | -C15 | 1.407 |
| C12             | -O20 | -O20 | 1.363 |
| C14             | -O22 | -O22 | 1.358 |

|     |      |      |       |
|-----|------|------|-------|
| C15 | -C18 | -C18 | 1.392 |
| C15 | -O21 | -O21 | 1.361 |
| C16 | -C18 | -C18 | 1.390 |
| C16 | -H26 | -H26 | 1.080 |
| O17 | -H27 | -H27 | 0.983 |
| C18 | -H28 | -H28 | 1.086 |
| O19 | -H29 | -H29 | 0.963 |
| O20 | -H30 | -H30 | 0.963 |
| O21 | -H31 | -H31 | 0.963 |
| O22 | -H32 | -H32 | 0.963 |

| (C) Bond angles |      |      |         |
|-----------------|------|------|---------|
| Atoms           |      |      | °       |
| C3              | -C1  | -C2  | 122.808 |
| O17             | -C1  | -C2  | 124.019 |
| O17             | -C1  | -C3  | 113.173 |
| O5              | -C2  | -C1  | 118.610 |
| C8              | -C2  | -C1  | 128.966 |
| C8              | -C2  | -O5  | 112.424 |
| C4              | -C3  | -C1  | 115.664 |
| O13             | -C3  | -C1  | 117.003 |
| O13             | -C3  | -C4  | 127.334 |
| C6              | -C4  | -C3  | 118.339 |
| C7              | -C4  | -C3  | 124.582 |
| C7              | -C4  | -C6  | 117.078 |
| C6              | -O5  | -C2  | 122.603 |
| O5              | -C6  | -C4  | 121.976 |
| C9              | -C6  | -C4  | 122.800 |
| C9              | -C6  | -O5  | 115.224 |
| C10             | -C7  | -C4  | 120.636 |
| O19             | -C7  | -C4  | 117.758 |
| O19             | -C7  | -C10 | 121.605 |
| C11             | -C8  | -C2  | 121.540 |
| C16             | -C8  | -C2  | 120.369 |
| C16             | -C8  | -C11 | 118.091 |
| C14             | -C9  | -C6  | 118.346 |
| H23             | -C9  | -C6  | 119.361 |
| H23             | -C9  | -C14 | 122.293 |
| C14             | -C10 | -C7  | 120.231 |
| H24             | -C10 | -C7  | 121.052 |
| H24             | -C10 | -C14 | 118.717 |
| C12             | -C11 | -C8  | 121.477 |
| H25             | -C11 | -C8  | 119.755 |

|     |      |      |         |
|-----|------|------|---------|
| H25 | -C11 | -C12 | 118.768 |
| C15 | -C12 | -C11 | 119.902 |
| O20 | -C12 | -C11 | 123.033 |
| O20 | -C12 | -C15 | 117.064 |
| C10 | -C14 | -C9  | 120.908 |
| O22 | -C14 | -C9  | 122.763 |
| O22 | -C14 | -C10 | 116.328 |
| C18 | -C15 | -C12 | 118.782 |
| O21 | -C15 | -C12 | 117.483 |
| O21 | -C15 | -C18 | 123.735 |
| C18 | -C16 | -C8  | 120.377 |
| H26 | -C16 | -C8  | 120.102 |
| H26 | -C16 | -C18 | 119.521 |
| H27 | -O17 | -C1  | 102.627 |
| C16 | -C18 | -C15 | 121.371 |
| H28 | -C18 | -C15 | 118.945 |
| H28 | -C18 | -C16 | 119.684 |
| H29 | -O19 | -C7  | 108.983 |
| H30 | -O20 | -C12 | 108.691 |
| H31 | -O21 | -C15 | 108.905 |
| H32 | -O22 | -C14 | 109.665 |

| (D) Torsional angles |     |      |      |          |
|----------------------|-----|------|------|----------|
| Atoms                |     |      |      | °        |
| C1                   | -C2 | -O5  | -C6  | 0.167    |
| C1                   | -C2 | -C8  | -C11 | -0.691   |
| C1                   | -C2 | -C8  | -C16 | 179.288  |
| C1                   | -C3 | -C4  | -C6  | 0.072    |
| C1                   | -C3 | -C4  | -C7  | -179.927 |
| C2                   | -C1 | -C3  | -C4  | -0.133   |
| C2                   | -C1 | -C3  | -O13 | 179.917  |
| C2                   | -C1 | -O17 | -H27 | -179.959 |
| C2                   | -O5 | -C6  | -C4  | -0.231   |
| C2                   | -O5 | -C6  | -C9  | 179.870  |
| C2                   | -C8 | -C11 | -C12 | 179.963  |
| C2                   | -C8 | -C11 | -H25 | 0.050    |
| C2                   | -C8 | -C16 | -C18 | -179.944 |
| C2                   | -C8 | -C16 | -H26 | -0.129   |
| C3                   | -C1 | -C2  | -O5  | 0.020    |
| C3                   | -C1 | -C2  | -C8  | -179.942 |
| C3                   | -C1 | -O17 | -H27 | 0.036    |
| C3                   | -C4 | -C6  | -O5  | 0.101    |
| C3                   | -C4 | -C6  | -C9  | 179.992  |

|     |      |      |      |          |
|-----|------|------|------|----------|
| C3  | -C4  | -C7  | -C10 | 179.998  |
| C3  | -C4  | -C7  | -O19 | -0.007   |
| C4  | -C3  | -C1  | -O17 | 179.871  |
| C4  | -C6  | -C9  | -C14 | 0.034    |
| C4  | -C6  | -C9  | -H23 | 179.916  |
| C4  | -C7  | -C10 | -C14 | -0.014   |
| C4  | -C7  | -C10 | -H24 | -179.979 |
| C4  | -C7  | -O19 | -H29 | 179.965  |
| O5  | -C2  | -C1  | -O17 | -179.985 |
| O5  | -C2  | -C8  | -C11 | 179.346  |
| O5  | -C2  | -C8  | -C16 | -0.675   |
| O5  | -C6  | -C4  | -C7  | -179.900 |
| O5  | -C6  | -C9  | -C14 | 179.931  |
| O5  | -C6  | -C9  | -H23 | -0.186   |
| C6  | -C4  | -C3  | -O13 | -179.984 |
| C6  | -C4  | -C7  | -C10 | -0.001   |
| C6  | -C4  | -C7  | -O19 | 179.994  |
| C6  | -O5  | -C2  | -C8  | -179.866 |
| C6  | -C9  | -C14 | -C10 | -0.049   |
| C6  | -C9  | -C14 | -O22 | 179.947  |
| C7  | -C4  | -C3  | -O13 | 0.017    |
| C7  | -C4  | -C6  | -C9  | -0.009   |
| C7  | -C10 | -C14 | -C9  | 0.040    |
| C7  | -C10 | -C14 | -O22 | -179.956 |
| C8  | -C2  | -C1  | -O17 | 0.053    |
| C8  | -C11 | -C12 | -C15 | -0.024   |
| C8  | -C11 | -C12 | -O20 | -179.951 |
| C8  | -C16 | -C18 | -C15 | -0.015   |
| C8  | -C16 | -C18 | -H28 | 179.931  |
| C9  | -C14 | -C10 | -H24 | -179.994 |
| C9  | -C14 | -O22 | -H32 | -0.008   |
| C10 | -C7  | -O19 | -H29 | -0.040   |
| C10 | -C14 | -C9  | -H23 | -179.928 |
| C10 | -C14 | -O22 | -H32 | 179.988  |
| C11 | -C8  | -C16 | -C18 | 0.036    |
| C11 | -C8  | -C16 | -H26 | 179.851  |
| C11 | -C12 | -C15 | -C18 | 0.044    |
| C11 | -C12 | -C15 | -O21 | -179.994 |
| C11 | -C12 | -O20 | -H30 | -0.273   |
| C12 | -C11 | -C8  | -C16 | -0.016   |
| C12 | -C15 | -C18 | -C16 | -0.025   |
| C12 | -C15 | -C18 | -H28 | -179.971 |
| C12 | -C15 | -O21 | -H31 | -179.916 |

|     |      |      |      |          |
|-----|------|------|------|----------|
| O13 | -C3  | -C1  | -O17 | -0.078   |
| C14 | -C10 | -C7  | -O19 | 179.991  |
| C15 | -C12 | -C11 | -H25 | 179.891  |
| C15 | -C12 | -O20 | -H30 | 179.798  |
| C15 | -C18 | -C16 | -H26 | -179.831 |
| C16 | -C8  | -C11 | -H25 | -179.930 |
| C16 | -C18 | -C15 | -O21 | -179.984 |
| C18 | -C15 | -C12 | -O20 | 179.975  |
| C18 | -C15 | -O21 | -H31 | 0.043    |
| O19 | -C7  | -C10 | -H24 | 0.026    |
| O20 | -C12 | -C11 | -H25 | -0.036   |
| O20 | -C12 | -C15 | -O21 | -0.063   |
| O21 | -C15 | -C18 | -H28 | 0.070    |
| O22 | -C14 | -C9  | -H23 | 0.068    |
| O22 | -C14 | -C10 | -H24 | 0.010    |
| H26 | -C16 | -C18 | -H28 | 0.115    |

**Table S2.** Natural population analysis derived from NBO analysis.

| Atom N. | Charge | Valence | Rydberg | Total |
|---------|--------|---------|---------|-------|
| C1      | 0.208  | 3.767   | 0.025   | 5.792 |
| C2      | 0.292  | 3.683   | 0.025   | 5.708 |
| C3      | 0.465  | 3.500   | 0.035   | 5.535 |
| C4      | -0.250 | 4.230   | 0.020   | 6.250 |
| O5      | -0.495 | 6.474   | 0.020   | 8.495 |
| C6      | 0.391  | 3.587   | 0.022   | 5.609 |
| C7      | 0.409  | 3.566   | 0.025   | 5.591 |
| C8      | -0.106 | 4.087   | 0.018   | 6.106 |
| C9      | -0.354 | 4.336   | 0.018   | 6.354 |
| C10     | -0.357 | 4.337   | 0.020   | 6.357 |
| C11     | -0.235 | 4.219   | 0.016   | 6.235 |
| C12     | 0.277  | 3.699   | 0.023   | 5.723 |
| O13     | -0.617 | 6.601   | 0.016   | 8.617 |
| C14     | 0.368  | 3.610   | 0.022   | 5.632 |
| C15     | 0.290  | 3.687   | 0.024   | 5.710 |
| C16     | -0.176 | 4.158   | 0.018   | 6.176 |
| O17     | -0.695 | 6.678   | 0.017   | 8.695 |
| C18     | -0.272 | 4.254   | 0.018   | 6.272 |
| O19     | -0.636 | 6.621   | 0.015   | 8.636 |
| O20     | -0.667 | 6.653   | 0.014   | 8.667 |
| O21     | -0.659 | 6.645   | 0.014   | 8.659 |
| O22     | -0.667 | 6.654   | 0.013   | 8.667 |
| H23     | 0.220  | 0.777   | 0.003   | 0.780 |
| H24     | 0.220  | 0.778   | 0.002   | 0.780 |

|     |       |       |       |       |
|-----|-------|-------|-------|-------|
| H25 | 0.236 | 0.761 | 0.003 | 0.764 |
| H26 | 0.219 | 0.778 | 0.003 | 0.781 |
| H27 | 0.501 | 0.493 | 0.006 | 0.499 |
| H28 | 0.203 | 0.795 | 0.002 | 0.797 |
| H29 | 0.470 | 0.526 | 0.004 | 0.530 |
| H30 | 0.472 | 0.524 | 0.004 | 0.528 |
| H31 | 0.469 | 0.526 | 0.004 | 0.531 |
| H32 | 0.475 | 0.521 | 0.004 | 0.525 |

**Table S3.** Second order perturbation analysis of Fock matrix in NBO basis. E(2) is expressed in kcal/mol, while E(NL)-E(L) and F(L,NL) are expressed in atomic units.

| Donor (L) NBO  | Acceptor (NL) NBO   | E(2)   | E(NL)-E(L) | F(L,NL) |
|----------------|---------------------|--------|------------|---------|
| 23. LP (1) O5  | 79. BD*(1) C1-C2    | 4.230  | 1.080      | 0.060   |
| 23. LP (1) O5  | 82. BD*(1) C1-O17   | 0.510  | 0.860      | 0.019   |
| 23. LP (1) O5  | 84. BD*(1) C2-C8    | 1.300  | 0.960      | 0.032   |
| 23. LP (1) O5  | 88. BD*(1) C4-C6    | 6.000  | 1.020      | 0.070   |
| 23. LP (1) O5  | 92. BD*(1) C6-C9    | 1.290  | 1.030      | 0.033   |
| 23. LP (1) O5  | 137. RY (1) C2      | 1.490  | 1.740      | 0.045   |
| 23. LP (1) O5  | 139. RY (3) C2      | 0.590  | 2.560      | 0.035   |
| 23. LP (1) O5  | 203. RY (1) C6      | 2.560  | 1.910      | 0.062   |
| 24. LP (2) O5  | 80. BD*(2) C1-C2    | 26.520 | 0.380      | 0.089   |
| 24. LP (2) O5  | 89. BD*(2) C4-C6    | 35.180 | 0.360      | 0.100   |
| 24. LP (2) O5  | 140. RY (4) C2      | 1.540  | 1.500      | 0.043   |
| 24. LP (2) O5  | 141. RY (5) C2      | 0.830  | 1.730      | 0.034   |
| 24. LP (2) O5  | 205. RY (3) C6      | 2.310  | 1.860      | 0.058   |
| 25. LP (1) O13 | 81. BD*(1) C1-C3    | 1.360  | 0.990      | 0.033   |
| 25. LP (1) O13 | 85. BD*(1) C3-C4    | 0.880  | 1.020      | 0.027   |
| 25. LP (1) O13 | 115. BD*(1) O17-H27 | 0.670  | 0.950      | 0.023   |
| 25. LP (1) O13 | 154. RY (1) C3      | 8.840  | 1.630      | 0.107   |
| 25. LP (1) O13 | 167. RY (14) C3     | 0.550  | 7.510      | 0.057   |
| 26. LP (2) O13 | 79. BD*(1) C1-C2    | 0.510  | 0.840      | 0.019   |
| 26. LP (2) O13 | 81. BD*(1) C1-C3    | 18.330 | 0.700      | 0.101   |
| 26. LP (2) O13 | 85. BD*(1) C3-C4    | 19.230 | 0.730      | 0.105   |
| 26. LP (2) O13 | 115. BD*(1) O17-H27 | 6.640  | 0.660      | 0.059   |
| 26. LP (2) O13 | 154. RY (1) C3      | 0.560  | 1.350      | 0.025   |
| 26. LP (2) O13 | 155. RY (2) C3      | 2.040  | 1.990      | 0.057   |
| 26. LP (2) O13 | 157. RY (4) C3      | 1.840  | 2.390      | 0.059   |
| 27. LP (1) O17 | 81. BD*(1) C1-C3    | 4.300  | 0.970      | 0.058   |
| 27. LP (1) O17 | 106. BD*(1) C11-H25 | 2.040  | 0.990      | 0.040   |
| 27. LP (1) O17 | 121. RY (1) C1      | 2.280  | 1.660      | 0.055   |
| 27. LP (1) O17 | 124. RY (4) C1      | 0.510  | 1.950      | 0.028   |
| 27. LP (1) O17 | 512. RY (1) H27     | 0.690  | 2.270      | 0.035   |
| 28. LP (2) O17 | 80. BD*(2) C1-C2    | 33.920 | 0.340      | 0.096   |



|                  |                     |        |       |       |
|------------------|---------------------|--------|-------|-------|
| 28. LP (2) O17   | 123. RY (3) C1      | 2.580  | 1.840 | 0.061 |
| 28. LP (2) O17   | 513. RY (2) H27     | 1.520  | 1.860 | 0.047 |
| 29. LP (1) O19   | 90. BD*(1) C4-C7    | 0.880  | 1.030 | 0.027 |
| 29. LP (1) O19   | 93. BD*(1) C7-C10   | 5.300  | 1.080 | 0.067 |
| 29. LP (1) O19   | 220. RY (1) C7      | 2.210  | 1.790 | 0.056 |
| 29. LP (1) O19   | 222. RY (3) C7      | 0.690  | 2.190 | 0.035 |
| 29. LP (1) O19   | 525. RY (2) H29     | 1.390  | 2.280 | 0.050 |
| 30. LP (2) O19   | 94. BD*(2) C7-C10   | 37.670 | 0.340 | 0.101 |
| 30. LP (2) O19   | 221. RY (2) C7      | 2.440  | 1.880 | 0.060 |
| 30. LP (2) O19   | 524. RY (1) H29     | 2.000  | 1.860 | 0.054 |
| 31. LP (1) O20   | 104. BD*(1) C11-C12 | 5.330  | 1.100 | 0.068 |
| 31. LP (1) O20   | 107. BD*(1) C12-C15 | 0.970  | 1.050 | 0.029 |
| 31. LP (1) O20   | 302. RY (1) C12     | 1.990  | 1.720 | 0.052 |
| 31. LP (1) O20   | 305. RY (4) C12     | 0.770  | 2.610 | 0.040 |
| 31. LP (1) O20   | 531. RY (2) H30     | 1.340  | 2.300 | 0.050 |
| 32. LP (2) O20   | 105. BD*(2) C11-C12 | 30.830 | 0.350 | 0.092 |
| 32. LP (2) O20   | 304. RY (3) C12     | 2.220  | 1.880 | 0.058 |
| 32. LP (2) O20   | 530. RY (1) H30     | 1.990  | 1.860 | 0.054 |
| 33. LP (1) O21   | 107. BD*(1) C12-C15 | 0.980  | 1.060 | 0.029 |
| 33. LP (1) O21   | 110. BD*(1) C15-C18 | 5.600  | 1.090 | 0.070 |
| 33. LP (1) O21   | 353. RY (1) C15     | 1.900  | 1.720 | 0.051 |
| 33. LP (1) O21   | 356. RY (4) C15     | 0.680  | 2.140 | 0.034 |
| 33. LP (1) O21   | 537. RY (2) H31     | 1.430  | 2.200 | 0.050 |
| 34. LP (2) O21   | 111. BD*(2) C15-C18 | 32.370 | 0.350 | 0.095 |
| 34. LP (2) O21   | 355. RY (3) C15     | 2.230  | 1.880 | 0.058 |
| 34. LP (2) O21   | 536. RY (1) H31     | 2.030  | 1.860 | 0.055 |
| 35. LP (1) O22   | 99. BD*(1) C9-C14   | 5.570  | 1.100 | 0.070 |
| 35. LP (1) O22   | 102. BD*(1) C10-C14 | 0.640  | 1.080 | 0.023 |
| 35. LP (1) O22   | 336. RY (1) C14     | 2.410  | 1.680 | 0.057 |
| 35. LP (1) O22   | 339. RY (4) C14     | 0.540  | 2.350 | 0.032 |
| 35. LP (1) O22   | 543. RY (2) H32     | 1.350  | 2.320 | 0.050 |
| 36. LP (2) O22   | 100. BD*(2) C9-C14  | 34.990 | 0.350 | 0.099 |
| 36. LP (2) O22   | 338. RY (3) C14     | 2.230  | 1.890 | 0.058 |
| 36. LP (2) O22   | 542. RY (1) H32     | 1.930  | 1.860 | 0.054 |
| 37. BD (1) C1-C2 | 81. BD*(1) C1-C3    | 2.110  | 1.100 | 0.043 |
| 37. BD (1) C1-C2 | 82. BD*(1) C1-O17   | 1.050  | 1.030 | 0.029 |
| 37. BD (1) C1-C2 | 84. BD*(1) C2-C8    | 3.400  | 1.120 | 0.055 |
| 37. BD (1) C1-C2 | 86. BD*(1) C3-O13   | 1.110  | 1.230 | 0.033 |
| 37. BD (1) C1-C2 | 97. BD*(1) C8-C16   | 1.450  | 1.210 | 0.037 |
| 37. BD (1) C1-C2 | 115. BD*(1) O17-H27 | 1.200  | 1.060 | 0.032 |
| 37. BD (1) C1-C2 | 157. RY (4) C3      | 0.780  | 2.780 | 0.041 |
| 37. BD (1) C1-C2 | 186. RY (1) O5      | 0.560  | 1.520 | 0.026 |
| 37. BD (1) C1-C2 | 237. RY (2) C8      | 2.060  | 2.100 | 0.059 |

|                   |                     |        |       |       |
|-------------------|---------------------|--------|-------|-------|
| 38. BD (2) C1-C2  | 87. BD*(2) C3-O13   | 21.780 | 0.300 | 0.072 |
| 38. BD (2) C1-C2  | 98. BD*(2) C8-C16   | 13.440 | 0.320 | 0.059 |
| 38. BD (2) C1-C2  | 188. RY (3) O5      | 1.000  | 0.970 | 0.028 |
| 38. BD (2) C1-C2  | 239. RY (4) C8      | 0.960  | 1.090 | 0.029 |
| 38. BD (2) C1-C2  | 386. RY (1) O17     | 1.750  | 0.770 | 0.033 |
| 39. BD (1) C1-C3  | 79. BD*(1) C1-C2    | 2.420  | 1.180 | 0.048 |
| 39. BD (1) C1-C3  | 83. BD*(1) C2-O5    | 0.970  | 0.930 | 0.027 |
| 39. BD (1) C1-C3  | 84. BD*(1) C2-C8    | 3.060  | 1.060 | 0.051 |
| 39. BD (1) C1-C3  | 85. BD*(1) C3-C4    | 0.720  | 1.060 | 0.025 |
| 39. BD (1) C1-C3  | 90. BD*(1) C4-C7    | 2.410  | 1.100 | 0.046 |
| 39. BD (1) C1-C3  | 137. RY (1) C2      | 0.810  | 1.840 | 0.035 |
| 39. BD (1) C1-C3  | 171. RY (2) C4      | 1.470  | 2.080 | 0.049 |
| 39. BD (1) C1-C3  | 319. RY (1) O13     | 0.800  | 1.390 | 0.030 |
| 40. BD (1) C1-O17 | 79. BD*(1) C1-C2    | 1.280  | 1.390 | 0.038 |
| 40. BD (1) C1-O17 | 83. BD*(1) C2-O5    | 2.070  | 1.130 | 0.043 |
| 40. BD (1) C1-O17 | 85. BD*(1) C3-C4    | 1.050  | 1.270 | 0.033 |
| 41. BD (1) C2-O5  | 82. BD*(1) C1-O17   | 2.360  | 1.180 | 0.047 |
| 41. BD (1) C2-O5  | 92. BD*(1) C6-C9    | 1.680  | 1.350 | 0.042 |
| 41. BD (1) C2-O5  | 96. BD*(1) C8-C11   | 1.430  | 1.360 | 0.039 |
| 41. BD (1) C2-O5  | 204. RY (2) C6      | 1.860  | 2.590 | 0.062 |
| 41. BD (1) C2-O5  | 237. RY (2) C8      | 1.030  | 2.250 | 0.043 |
| 42. BD (1) C2-C8  | 79. BD*(1) C1-C2    | 2.900  | 1.170 | 0.052 |
| 42. BD (1) C2-C8  | 81. BD*(1) C1-C3    | 1.830  | 1.030 | 0.039 |
| 42. BD (1) C2-C8  | 91. BD*(1) O5-C6    | 2.450  | 0.950 | 0.043 |
| 42. BD (1) C2-C8  | 96. BD*(1) C8-C11   | 1.860  | 1.140 | 0.041 |
| 42. BD (1) C2-C8  | 97. BD*(1) C8-C16   | 2.110  | 1.140 | 0.044 |
| 42. BD (1) C2-C8  | 104. BD*(1) C11-C12 | 1.430  | 1.160 | 0.036 |
| 42. BD (1) C2-C8  | 113. BD*(1) C16-C18 | 1.520  | 1.160 | 0.038 |
| 42. BD (1) C2-C8  | 121. RY (1) C1      | 1.070  | 1.730 | 0.038 |
| 42. BD (1) C2-C8  | 186. RY (1) O5      | 0.630  | 1.450 | 0.027 |
| 42. BD (1) C2-C8  | 287. RY (2) C11     | 0.820  | 1.740 | 0.034 |
| 42. BD (1) C2-C8  | 370. RY (1) C16     | 1.230  | 1.760 | 0.042 |
| 43. BD (1) C3-C4  | 81. BD*(1) C1-C3    | 0.610  | 1.040 | 0.022 |
| 43. BD (1) C3-C4  | 82. BD*(1) C1-O17   | 1.890  | 0.960 | 0.038 |
| 43. BD (1) C3-C4  | 86. BD*(1) C3-O13   | 1.330  | 1.170 | 0.035 |
| 43. BD (1) C3-C4  | 88. BD*(1) C4-C6    | 1.720  | 1.120 | 0.039 |
| 43. BD (1) C3-C4  | 90. BD*(1) C4-C7    | 2.010  | 1.100 | 0.042 |
| 43. BD (1) C3-C4  | 91. BD*(1) O5-C6    | 0.550  | 0.950 | 0.020 |
| 43. BD (1) C3-C4  | 92. BD*(1) C6-C9    | 2.360  | 1.140 | 0.046 |
| 43. BD (1) C3-C4  | 93. BD*(1) C7-C10   | 1.640  | 1.150 | 0.039 |
| 43. BD (1) C3-C4  | 122. RY (2) C1      | 0.500  | 2.250 | 0.030 |
| 43. BD (1) C3-C4  | 203. RY (1) C6      | 0.720  | 2.010 | 0.034 |
| 43. BD (1) C3-C4  | 220. RY (1) C7      | 1.270  | 1.860 | 0.043 |

|                   |                     |        |       |       |
|-------------------|---------------------|--------|-------|-------|
| 43. BD (1) C3-C4  | 319. RY (1) O13     | 0.750  | 1.390 | 0.029 |
| 44. BD (1) C3-O13 | 79. BD*(1) C1-C2    | 0.950  | 1.460 | 0.033 |
| 44. BD (1) C3-O13 | 81. BD*(1) C1-C3    | 0.850  | 1.320 | 0.030 |
| 44. BD (1) C3-O13 | 85. BD*(1) C3-C4    | 1.940  | 1.340 | 0.046 |
| 44. BD (1) C3-O13 | 88. BD*(1) C4-C6    | 0.770  | 1.400 | 0.029 |
| 44. BD (1) C3-O13 | 122. RY (2) C1      | 1.180  | 2.530 | 0.049 |
| 44. BD (1) C3-O13 | 170. RY (1) C4      | 1.420  | 2.350 | 0.052 |
| 45. BD (2) C3-O13 | 80. BD*(2) C1-C2    | 6.500  | 0.390 | 0.045 |
| 45. BD (2) C3-O13 | 89. BD*(2) C4-C6    | 5.410  | 0.370 | 0.040 |
| 46. BD (1) C4-C6  | 85. BD*(1) C3-C4    | 2.030  | 1.090 | 0.042 |
| 46. BD (1) C4-C6  | 86. BD*(1) C3-O13   | 2.630  | 1.200 | 0.050 |
| 46. BD (1) C4-C6  | 90. BD*(1) C4-C7    | 2.210  | 1.130 | 0.045 |
| 46. BD (1) C4-C6  | 92. BD*(1) C6-C9    | 2.860  | 1.160 | 0.051 |
| 46. BD (1) C4-C6  | 95. BD*(1) C7-O19   | 2.680  | 0.980 | 0.046 |
| 46. BD (1) C4-C6  | 101. BD*(1) C9-H23  | 1.800  | 1.030 | 0.039 |
| 46. BD (1) C4-C6  | 157. RY (4) C3      | 0.810  | 2.750 | 0.042 |
| 46. BD (1) C4-C6  | 186. RY (1) O5      | 0.870  | 1.490 | 0.032 |
| 46. BD (1) C4-C6  | 220. RY (1) C7      | 0.670  | 1.890 | 0.032 |
| 46. BD (1) C4-C6  | 252. RY (1) C9      | 1.010  | 1.890 | 0.039 |
| 46. BD (1) C4-C6  | 253. RY (2) C9      | 0.830  | 1.710 | 0.034 |
| 47. BD (2) C4-C6  | 87. BD*(2) C3-O13   | 28.660 | 0.290 | 0.081 |
| 47. BD (2) C4-C6  | 89. BD*(2) C4-C6    | 3.550  | 0.280 | 0.028 |
| 47. BD (2) C4-C6  | 94. BD*(2) C7-C10   | 24.570 | 0.280 | 0.075 |
| 47. BD (2) C4-C6  | 100. BD*(2) C9-C14  | 12.650 | 0.280 | 0.053 |
| 47. BD (2) C4-C6  | 156. RY (3) C3      | 0.600  | 1.860 | 0.030 |
| 47. BD (2) C4-C6  | 159. RY (6) C3      | 0.590  | 1.650 | 0.028 |
| 47. BD (2) C4-C6  | 188. RY (3) O5      | 1.200  | 0.950 | 0.030 |
| 47. BD (2) C4-C6  | 225. RY (6) C7      | 1.060  | 1.550 | 0.036 |
| 47. BD (2) C4-C6  | 254. RY (3) C9      | 1.790  | 0.770 | 0.033 |
| 48. BD (1) C4-C7  | 81. BD*(1) C1-C3    | 0.940  | 1.050 | 0.028 |
| 48. BD (1) C4-C7  | 85. BD*(1) C3-C4    | 2.460  | 1.080 | 0.046 |
| 48. BD (1) C4-C7  | 88. BD*(1) C4-C6    | 2.200  | 1.130 | 0.045 |
| 48. BD (1) C4-C7  | 91. BD*(1) O5-C6    | 3.480  | 0.970 | 0.052 |
| 48. BD (1) C4-C7  | 93. BD*(1) C7-C10   | 2.600  | 1.160 | 0.049 |
| 48. BD (1) C4-C7  | 95. BD*(1) C7-O19   | 0.510  | 0.970 | 0.020 |
| 48. BD (1) C4-C7  | 103. BD*(1) C10-H24 | 2.060  | 1.020 | 0.041 |
| 48. BD (1) C4-C7  | 117. BD*(1) O19-H29 | 1.910  | 1.000 | 0.039 |
| 48. BD (1) C4-C7  | 154. RY (1) C3      | 0.870  | 1.700 | 0.034 |
| 48. BD (1) C4-C7  | 158. RY (5) C3      | 0.790  | 3.120 | 0.044 |
| 48. BD (1) C4-C7  | 204. RY (2) C6      | 0.990  | 2.390 | 0.043 |
| 48. BD (1) C4-C7  | 269. RY (1) C10     | 0.910  | 1.770 | 0.036 |
| 48. BD (1) C4-C7  | 270. RY (2) C10     | 0.560  | 1.560 | 0.026 |
| 48. BD (1) C4-C7  | 420. RY (1) O19     | 0.500  | 1.570 | 0.025 |

|                   |                     |        |       |       |
|-------------------|---------------------|--------|-------|-------|
| 49. BD (1) O5-C6  | 84. BD*(1) C2-C8    | 1.170  | 1.300 | 0.035 |
| 49. BD (1) O5-C6  | 90. BD*(1) C4-C7    | 0.990  | 1.340 | 0.033 |
| 49. BD (1) O5-C6  | 99. BD*(1) C9-C14   | 0.870  | 1.400 | 0.031 |
| 49. BD (1) O5-C6  | 138. RY (2) C2      | 1.010  | 2.540 | 0.045 |
| 49. BD (1) O5-C6  | 252. RY (1) C9      | 0.670  | 2.100 | 0.033 |
| 50. BD (1) C6-C9  | 83. BD*(1) C2-O5    | 2.580  | 0.960 | 0.044 |
| 50. BD (1) C6-C9  | 85. BD*(1) C3-C4    | 1.960  | 1.090 | 0.041 |
| 50. BD (1) C6-C9  | 88. BD*(1) C4-C6    | 2.750  | 1.150 | 0.050 |
| 50. BD (1) C6-C9  | 99. BD*(1) C9-C14   | 1.980  | 1.180 | 0.043 |
| 50. BD (1) C6-C9  | 101. BD*(1) C9-H23  | 1.270  | 1.030 | 0.032 |
| 50. BD (1) C6-C9  | 109. BD*(1) C14-O22 | 3.780  | 0.960 | 0.054 |
| 50. BD (1) C6-C9  | 171. RY (2) C4      | 1.070  | 2.110 | 0.042 |
| 50. BD (1) C6-C9  | 186. RY (1) O5      | 1.080  | 1.490 | 0.036 |
| 50. BD (1) C6-C9  | 337. RY (2) C14     | 1.650  | 2.210 | 0.054 |
| 51. BD (1) C7-C10 | 85. BD*(1) C3-C4    | 2.200  | 1.100 | 0.044 |
| 51. BD (1) C7-C10 | 90. BD*(1) C4-C7    | 3.050  | 1.130 | 0.052 |
| 51. BD (1) C7-C10 | 102. BD*(1) C10-C14 | 1.890  | 1.170 | 0.042 |
| 51. BD (1) C7-C10 | 103. BD*(1) C10-H24 | 1.120  | 1.040 | 0.031 |
| 51. BD (1) C7-C10 | 109. BD*(1) C14-O22 | 2.610  | 0.970 | 0.045 |
| 51. BD (1) C7-C10 | 170. RY (1) C4      | 1.240  | 2.100 | 0.046 |
| 51. BD (1) C7-C10 | 336. RY (1) C14     | 1.730  | 1.770 | 0.049 |
| 52. BD (2) C7-C10 | 89. BD*(2) C4-C6    | 12.550 | 0.280 | 0.053 |
| 52. BD (2) C7-C10 | 94. BD*(2) C7-C10   | 2.160  | 0.290 | 0.022 |
| 52. BD (2) C7-C10 | 100. BD*(2) C9-C14  | 27.630 | 0.280 | 0.079 |
| 52. BD (2) C7-C10 | 172. RY (3) C4      | 1.280  | 0.840 | 0.029 |
| 52. BD (2) C7-C10 | 340. RY (5) C14     | 0.670  | 1.910 | 0.032 |
| 52. BD (2) C7-C10 | 343. RY (8) C14     | 0.660  | 0.780 | 0.020 |
| 52. BD (2) C7-C10 | 421. RY (2) O19     | 1.390  | 0.870 | 0.031 |
| 53. BD (1) C7-O19 | 88. BD*(1) C4-C6    | 1.250  | 1.350 | 0.037 |
| 53. BD (1) C7-O19 | 90. BD*(1) C4-C7    | 0.550  | 1.330 | 0.024 |
| 53. BD (1) C7-O19 | 93. BD*(1) C7-C10   | 0.670  | 1.380 | 0.027 |
| 53. BD (1) C7-O19 | 102. BD*(1) C10-C14 | 0.820  | 1.370 | 0.030 |
| 53. BD (1) C7-O19 | 170. RY (1) C4      | 0.990  | 2.300 | 0.043 |
| 54. BD (1) C8-C11 | 83. BD*(1) C2-O5    | 2.140  | 0.920 | 0.040 |
| 54. BD (1) C8-C11 | 84. BD*(1) C2-C8    | 1.620  | 1.050 | 0.037 |
| 54. BD (1) C8-C11 | 97. BD*(1) C8-C16   | 3.000  | 1.130 | 0.052 |
| 54. BD (1) C8-C11 | 104. BD*(1) C11-C12 | 2.090  | 1.160 | 0.044 |
| 54. BD (1) C8-C11 | 106. BD*(1) C11-H25 | 1.460  | 1.040 | 0.035 |
| 54. BD (1) C8-C11 | 108. BD*(1) C12-O20 | 3.180  | 0.940 | 0.049 |
| 54. BD (1) C8-C11 | 114. BD*(1) C16-H26 | 2.260  | 1.040 | 0.043 |
| 54. BD (1) C8-C11 | 137. RY (1) C2      | 1.640  | 1.830 | 0.049 |
| 54. BD (1) C8-C11 | 303. RY (2) C12     | 1.540  | 3.510 | 0.066 |
| 54. BD (1) C8-C11 | 370. RY (1) C16     | 0.960  | 1.750 | 0.037 |

|                   |                     |        |       |       |
|-------------------|---------------------|--------|-------|-------|
| 55. BD (1) C8-C16 | 79. BD*(1) C1-C2    | 1.580  | 1.170 | 0.038 |
| 55. BD (1) C8-C16 | 83. BD*(1) C2-O5    | 0.620  | 0.920 | 0.021 |
| 55. BD (1) C8-C16 | 84. BD*(1) C2-C8    | 1.780  | 1.050 | 0.039 |
| 55. BD (1) C8-C16 | 96. BD*(1) C8-C11   | 2.900  | 1.130 | 0.051 |
| 55. BD (1) C8-C16 | 106. BD*(1) C11-H25 | 2.290  | 1.040 | 0.044 |
| 55. BD (1) C8-C16 | 113. BD*(1) C16-C18 | 2.260  | 1.160 | 0.046 |
| 55. BD (1) C8-C16 | 114. BD*(1) C16-H26 | 1.060  | 1.040 | 0.030 |
| 55. BD (1) C8-C16 | 116. BD*(1) C18-H28 | 2.170  | 1.010 | 0.042 |
| 55. BD (1) C8-C16 | 137. RY (1) C2      | 1.530  | 1.830 | 0.047 |
| 55. BD (1) C8-C16 | 138. RY (2) C2      | 0.520  | 2.280 | 0.031 |
| 55. BD (1) C8-C16 | 286. RY (1) C11     | 0.710  | 1.720 | 0.031 |
| 55. BD (1) C8-C16 | 287. RY (2) C11     | 0.540  | 1.740 | 0.027 |
| 55. BD (1) C8-C16 | 403. RY (1) C18     | 0.710  | 1.750 | 0.032 |
| 55. BD (1) C8-C16 | 404. RY (2) C18     | 1.200  | 1.810 | 0.042 |
| 55. BD (1) C8-C16 | 506. RY (1) H26     | 0.820  | 1.420 | 0.030 |
| 56. BD (2) C8-C16 | 80. BD*(2) C1-C2    | 19.260 | 0.270 | 0.065 |
| 56. BD (2) C8-C16 | 105. BD*(2) C11-C12 | 19.480 | 0.280 | 0.066 |
| 56. BD (2) C8-C16 | 111. BD*(2) C15-C18 | 19.880 | 0.270 | 0.065 |
| 56. BD (2) C8-C16 | 140. RY (4) C2      | 0.640  | 1.400 | 0.027 |
| 56. BD (2) C8-C16 | 141. RY (5) C2      | 0.680  | 1.630 | 0.030 |
| 56. BD (2) C8-C16 | 288. RY (3) C11     | 1.940  | 1.090 | 0.041 |
| 56. BD (2) C8-C16 | 405. RY (3) C18     | 1.540  | 1.300 | 0.040 |
| 57. BD (1) C9-C14 | 91. BD*(1) O5-C6    | 2.950  | 0.990 | 0.048 |
| 57. BD (1) C9-C14 | 92. BD*(1) C6-C9    | 2.050  | 1.170 | 0.044 |
| 57. BD (1) C9-C14 | 101. BD*(1) C9-H23  | 1.190  | 1.040 | 0.031 |
| 57. BD (1) C9-C14 | 102. BD*(1) C10-C14 | 2.700  | 1.170 | 0.050 |
| 57. BD (1) C9-C14 | 103. BD*(1) C10-H24 | 1.860  | 1.050 | 0.039 |
| 57. BD (1) C9-C14 | 203. RY (1) C6      | 1.430  | 2.050 | 0.048 |
| 57. BD (1) C9-C14 | 204. RY (2) C6      | 0.720  | 2.410 | 0.037 |
| 57. BD (1) C9-C14 | 269. RY (1) C10     | 0.790  | 1.790 | 0.034 |
| 57. BD (1) C9-C14 | 471. RY (1) O22     | 0.570  | 1.290 | 0.024 |
| 58. BD (2) C9-C14 | 89. BD*(2) C4-C6    | 28.900 | 0.280 | 0.081 |
| 58. BD (2) C9-C14 | 94. BD*(2) C7-C10   | 12.220 | 0.290 | 0.053 |
| 58. BD (2) C9-C14 | 100. BD*(2) C9-C14  | 2.380  | 0.280 | 0.023 |
| 58. BD (2) C9-C14 | 207. RY (5) C6      | 0.920  | 1.840 | 0.037 |
| 58. BD (2) C9-C14 | 272. RY (4) C10     | 1.890  | 0.750 | 0.034 |
| 58. BD (2) C9-C14 | 472. RY (2) O22     | 1.340  | 0.920 | 0.031 |
| 59. BD (1) C9-H23 | 88. BD*(1) C4-C6    | 3.500  | 1.030 | 0.054 |
| 59. BD (1) C9-H23 | 91. BD*(1) O5-C6    | 1.600  | 0.870 | 0.033 |
| 59. BD (1) C9-H23 | 92. BD*(1) C6-C9    | 0.630  | 1.050 | 0.023 |
| 59. BD (1) C9-H23 | 99. BD*(1) C9-C14   | 0.620  | 1.060 | 0.023 |
| 59. BD (1) C9-H23 | 102. BD*(1) C10-C14 | 3.330  | 1.040 | 0.053 |
| 59. BD (1) C9-H23 | 109. BD*(1) C14-O22 | 1.160  | 0.850 | 0.028 |

|                    |                     |        |       |       |
|--------------------|---------------------|--------|-------|-------|
| 59. BD (1) C9-H23  | 203. RY (1) C6      | 0.660  | 1.920 | 0.032 |
| 59. BD (1) C9-H23  | 336. RY (1) C14     | 0.810  | 1.650 | 0.033 |
| 60. BD (1) C10-C14 | 93. BD*(1) C7-C10   | 1.790  | 1.170 | 0.041 |
| 60. BD (1) C10-C14 | 95. BD*(1) C7-O19   | 3.430  | 0.980 | 0.052 |
| 60. BD (1) C10-C14 | 99. BD*(1) C9-C14   | 2.460  | 1.180 | 0.048 |
| 60. BD (1) C10-C14 | 101. BD*(1) C9-H23  | 2.240  | 1.030 | 0.043 |
| 60. BD (1) C10-C14 | 103. BD*(1) C10-H24 | 1.110  | 1.030 | 0.030 |
| 60. BD (1) C10-C14 | 120. BD*(1) O22-H32 | 1.780  | 1.010 | 0.038 |
| 60. BD (1) C10-C14 | 222. RY (3) C7      | 1.880  | 2.290 | 0.058 |
| 60. BD (1) C10-C14 | 252. RY (1) C9      | 0.960  | 1.880 | 0.038 |
| 60. BD (1) C10-C14 | 471. RY (1) O22     | 0.770  | 1.270 | 0.028 |
| 61. BD (1) C10-H24 | 90. BD*(1) C4-C7    | 3.580  | 1.010 | 0.054 |
| 61. BD (1) C10-H24 | 93. BD*(1) C7-C10   | 0.670  | 1.050 | 0.024 |
| 61. BD (1) C10-H24 | 95. BD*(1) C7-O19   | 1.370  | 0.860 | 0.031 |
| 61. BD (1) C10-H24 | 99. BD*(1) C9-C14   | 3.320  | 1.060 | 0.053 |
| 61. BD (1) C10-H24 | 102. BD*(1) C10-C14 | 0.580  | 1.040 | 0.022 |
| 61. BD (1) C10-H24 | 109. BD*(1) C14-O22 | 1.360  | 0.840 | 0.030 |
| 61. BD (1) C10-H24 | 220. RY (1) C7      | 0.700  | 1.760 | 0.031 |
| 61. BD (1) C10-H24 | 337. RY (2) C14     | 0.750  | 2.080 | 0.035 |
| 62. BD (1) C11-C12 | 84. BD*(1) C2-C8    | 2.460  | 1.080 | 0.046 |
| 62. BD (1) C11-C12 | 96. BD*(1) C8-C11   | 2.720  | 1.160 | 0.050 |
| 62. BD (1) C11-C12 | 106. BD*(1) C11-H25 | 0.940  | 1.070 | 0.028 |
| 62. BD (1) C11-C12 | 107. BD*(1) C12-C15 | 2.810  | 1.150 | 0.051 |
| 62. BD (1) C11-C12 | 112. BD*(1) C15-O21 | 2.600  | 0.970 | 0.045 |
| 62. BD (1) C11-C12 | 236. RY (1) C8      | 2.270  | 1.970 | 0.060 |
| 62. BD (1) C11-C12 | 241. RY (6) C8      | 0.710  | 2.060 | 0.034 |
| 62. BD (1) C11-C12 | 303. RY (2) C12     | 0.680  | 3.540 | 0.044 |
| 62. BD (1) C11-C12 | 306. RY (5) C12     | 0.600  | 4.440 | 0.046 |
| 62. BD (1) C11-C12 | 308. RY (7) C12     | 0.990  | 6.290 | 0.071 |
| 62. BD (1) C11-C12 | 310. RY (9) C12     | 0.760  | 5.900 | 0.060 |
| 62. BD (1) C11-C12 | 314. RY (13) C12    | 0.740  | 4.080 | 0.049 |
| 62. BD (1) C11-C12 | 317. RY (16) C12    | 0.920  | 2.900 | 0.046 |
| 62. BD (1) C11-C12 | 353. RY (1) C15     | 1.260  | 1.810 | 0.043 |
| 62. BD (1) C11-C12 | 356. RY (4) C15     | 0.660  | 2.230 | 0.034 |
| 62. BD (1) C11-C12 | 438. RY (2) O20     | 0.530  | 1.380 | 0.024 |
| 63. BD (2) C11-C12 | 98. BD*(2) C8-C16   | 19.180 | 0.290 | 0.067 |
| 63. BD (2) C11-C12 | 111. BD*(2) C15-C18 | 19.810 | 0.280 | 0.067 |
| 63. BD (2) C11-C12 | 243. RY (8) C8      | 0.590  | 1.690 | 0.028 |
| 63. BD (2) C11-C12 | 360. RY (8) C15     | 1.050  | 1.290 | 0.033 |
| 63. BD (2) C11-C12 | 437. RY (1) O20     | 1.550  | 0.880 | 0.033 |
| 64. BD (1) C11-H25 | 84. BD*(1) C2-C8    | 0.520  | 0.950 | 0.020 |
| 64. BD (1) C11-H25 | 96. BD*(1) C8-C11   | 0.690  | 1.030 | 0.024 |
| 64. BD (1) C11-H25 | 97. BD*(1) C8-C16   | 3.590  | 1.030 | 0.054 |

|                    |                     |        |       |       |
|--------------------|---------------------|--------|-------|-------|
| 64. BD (1) C11-H25 | 104. BD*(1) C11-C12 | 0.590  | 1.060 | 0.022 |
| 64. BD (1) C11-H25 | 107. BD*(1) C12-C15 | 3.560  | 1.020 | 0.054 |
| 64. BD (1) C11-H25 | 108. BD*(1) C12-O20 | 1.500  | 0.840 | 0.032 |
| 64. BD (1) C11-H25 | 236. RY (1) C8      | 1.390  | 1.840 | 0.045 |
| 64. BD (1) C11-H25 | 302. RY (1) C12     | 0.730  | 1.680 | 0.031 |
| 64. BD (1) C11-H25 | 308. RY (7) C12     | 0.530  | 6.160 | 0.051 |
| 65. BD (1) C12-C15 | 104. BD*(1) C11-C12 | 2.180  | 1.190 | 0.046 |
| 65. BD (1) C12-C15 | 106. BD*(1) C11-H25 | 1.820  | 1.070 | 0.039 |
| 65. BD (1) C12-C15 | 110. BD*(1) C15-C18 | 2.150  | 1.180 | 0.045 |
| 65. BD (1) C12-C15 | 116. BD*(1) C18-H28 | 1.990  | 1.040 | 0.041 |
| 65. BD (1) C12-C15 | 118. BD*(1) O20-H30 | 1.610  | 1.030 | 0.036 |
| 65. BD (1) C12-C15 | 119. BD*(1) O21-H31 | 1.680  | 1.020 | 0.037 |
| 65. BD (1) C12-C15 | 286. RY (1) C11     | 1.320  | 1.750 | 0.043 |
| 65. BD (1) C12-C15 | 403. RY (1) C18     | 1.070  | 1.780 | 0.039 |
| 66. BD (1) C12-O20 | 96. BD*(1) C8-C11   | 1.150  | 1.350 | 0.035 |
| 66. BD (1) C12-O20 | 104. BD*(1) C11-C12 | 0.820  | 1.380 | 0.030 |
| 66. BD (1) C12-O20 | 110. BD*(1) C15-C18 | 1.160  | 1.360 | 0.035 |
| 66. BD (1) C12-O20 | 286. RY (1) C11     | 0.640  | 1.930 | 0.031 |
| 66. BD (1) C12-O20 | 353. RY (1) C15     | 0.650  | 2.000 | 0.032 |
| 67. BD (1) C14-O22 | 92. BD*(1) C6-C9    | 0.860  | 1.370 | 0.031 |
| 67. BD (1) C14-O22 | 93. BD*(1) C7-C10   | 0.960  | 1.380 | 0.032 |
| 68. BD (1) C15-C18 | 107. BD*(1) C12-C15 | 2.520  | 1.150 | 0.048 |
| 68. BD (1) C15-C18 | 108. BD*(1) C12-O20 | 2.670  | 0.980 | 0.046 |
| 68. BD (1) C15-C18 | 113. BD*(1) C16-C18 | 2.150  | 1.190 | 0.045 |
| 68. BD (1) C15-C18 | 114. BD*(1) C16-H26 | 1.860  | 1.070 | 0.040 |
| 68. BD (1) C15-C18 | 116. BD*(1) C18-H28 | 0.650  | 1.040 | 0.023 |
| 68. BD (1) C15-C18 | 302. RY (1) C12     | 1.250  | 1.820 | 0.043 |
| 68. BD (1) C15-C18 | 305. RY (4) C12     | 0.580  | 2.700 | 0.035 |
| 68. BD (1) C15-C18 | 370. RY (1) C16     | 0.990  | 1.780 | 0.038 |
| 68. BD (1) C15-C18 | 371. RY (2) C16     | 1.190  | 1.740 | 0.041 |
| 69. BD (2) C15-C18 | 98. BD*(2) C8-C16   | 21.420 | 0.290 | 0.071 |
| 69. BD (2) C15-C18 | 105. BD*(2) C11-C12 | 17.890 | 0.290 | 0.065 |
| 69. BD (2) C15-C18 | 309. RY (8) C12     | 0.670  | 0.790 | 0.020 |
| 69. BD (2) C15-C18 | 372. RY (3) C16     | 0.990  | 0.780 | 0.025 |
| 69. BD (2) C15-C18 | 374. RY (5) C16     | 0.750  | 1.810 | 0.033 |
| 69. BD (2) C15-C18 | 454. RY (1) O21     | 1.460  | 0.880 | 0.032 |
| 70. BD (1) C15-O21 | 104. BD*(1) C11-C12 | 1.070  | 1.390 | 0.034 |
| 70. BD (1) C15-O21 | 110. BD*(1) C15-C18 | 0.700  | 1.370 | 0.028 |
| 70. BD (1) C15-O21 | 113. BD*(1) C16-C18 | 0.910  | 1.380 | 0.032 |
| 70. BD (1) C15-O21 | 302. RY (1) C12     | 0.680  | 2.010 | 0.033 |
| 71. BD (1) C16-C18 | 84. BD*(1) C2-C8    | 2.810  | 1.060 | 0.049 |
| 71. BD (1) C16-C18 | 97. BD*(1) C8-C16   | 2.480  | 1.140 | 0.047 |
| 71. BD (1) C16-C18 | 110. BD*(1) C15-C18 | 2.040  | 1.160 | 0.043 |

|                    |                     |       |       |       |
|--------------------|---------------------|-------|-------|-------|
| 71. BD (1) C16-C18 | 112. BD*(1) C15-O21 | 3.540 | 0.950 | 0.052 |
| 71. BD (1) C16-C18 | 114. BD*(1) C16-H26 | 0.960 | 1.050 | 0.028 |
| 71. BD (1) C16-C18 | 116. BD*(1) C18-H28 | 1.110 | 1.020 | 0.030 |
| 71. BD (1) C16-C18 | 236. RY (1) C8      | 1.190 | 1.950 | 0.043 |
| 71. BD (1) C16-C18 | 237. RY (2) C8      | 0.810 | 2.040 | 0.036 |
| 71. BD (1) C16-C18 | 354. RY (2) C15     | 1.860 | 2.860 | 0.065 |
| 71. BD (1) C16-C18 | 506. RY (1) H26     | 0.770 | 1.420 | 0.030 |
| 71. BD (1) C16-C18 | 518. RY (1) H28     | 0.640 | 1.180 | 0.025 |
| 72. BD (1) C16-H26 | 84. BD*(1) C2-C8    | 0.610 | 0.940 | 0.021 |
| 72. BD (1) C16-H26 | 96. BD*(1) C8-C11   | 3.680 | 1.030 | 0.055 |
| 72. BD (1) C16-H26 | 97. BD*(1) C8-C16   | 0.520 | 1.030 | 0.021 |
| 72. BD (1) C16-H26 | 110. BD*(1) C15-C18 | 2.960 | 1.040 | 0.050 |
| 72. BD (1) C16-H26 | 113. BD*(1) C16-C18 | 0.590 | 1.050 | 0.022 |
| 72. BD (1) C16-H26 | 116. BD*(1) C18-H28 | 0.670 | 0.910 | 0.022 |
| 72. BD (1) C16-H26 | 236. RY (1) C8      | 1.220 | 1.840 | 0.042 |
| 72. BD (1) C16-H26 | 242. RY (7) C8      | 0.510 | 2.710 | 0.033 |
| 72. BD (1) C16-H26 | 403. RY (1) C18     | 0.800 | 1.650 | 0.032 |
| 73. BD (1) O17-H27 | 79. BD*(1) C1-C2    | 4.970 | 1.260 | 0.071 |
| 73. BD (1) O17-H27 | 81. BD*(1) C1-C3    | 1.120 | 1.110 | 0.032 |
| 73. BD (1) O17-H27 | 121. RY (1) C1      | 1.570 | 1.810 | 0.047 |
| 73. BD (1) O17-H27 | 122. RY (2) C1      | 0.780 | 2.330 | 0.038 |
| 73. BD (1) O17-H27 | 125. RY (5) C1      | 0.560 | 2.670 | 0.035 |
| 74. BD (1) C18-H28 | 97. BD*(1) C8-C16   | 3.090 | 1.040 | 0.051 |
| 74. BD (1) C18-H28 | 107. BD*(1) C12-C15 | 3.240 | 1.030 | 0.052 |
| 74. BD (1) C18-H28 | 112. BD*(1) C15-O21 | 1.260 | 0.850 | 0.029 |
| 74. BD (1) C18-H28 | 113. BD*(1) C16-C18 | 0.680 | 1.060 | 0.024 |
| 74. BD (1) C18-H28 | 114. BD*(1) C16-H26 | 0.630 | 0.950 | 0.022 |
| 74. BD (1) C18-H28 | 353. RY (1) C15     | 0.700 | 1.690 | 0.031 |
| 74. BD (1) C18-H28 | 370. RY (1) C16     | 1.050 | 1.660 | 0.037 |
| 75. BD (1) O19-H29 | 90. BD*(1) C4-C7    | 4.360 | 1.200 | 0.065 |
| 75. BD (1) O19-H29 | 220. RY (1) C7      | 1.710 | 1.960 | 0.052 |
| 75. BD (1) O19-H29 | 224. RY (5) C7      | 0.530 | 2.830 | 0.034 |
| 75. BD (1) O19-H29 | 270. RY (2) C10     | 0.650 | 1.650 | 0.029 |
| 76. BD (1) O20-H30 | 107. BD*(1) C12-C15 | 3.900 | 1.220 | 0.062 |
| 76. BD (1) O20-H30 | 302. RY (1) C12     | 1.770 | 1.890 | 0.052 |
| 77. BD (1) O21-H31 | 107. BD*(1) C12-C15 | 3.860 | 1.230 | 0.061 |
| 77. BD (1) O21-H31 | 353. RY (1) C15     | 1.880 | 1.900 | 0.053 |
| 78. BD (1) O22-H32 | 102. BD*(1) C10-C14 | 4.050 | 1.250 | 0.064 |
| 78. BD (1) O22-H32 | 253. RY (2) C9      | 0.560 | 1.800 | 0.028 |
| 78. BD (1) O22-H32 | 336. RY (1) C14     | 1.980 | 1.860 | 0.054 |
| 78. BD (1) O22-H32 | 337. RY (2) C14     | 0.540 | 2.300 | 0.032 |



**Table S4.** Interactions between Que and oxidative endogenous enzymes identified during the MD studies.

| NOX     |                |    | XO       |                |    | MPO     |             |    | LOX     |              |    | MAO-A   |                |    |
|---------|----------------|----|----------|----------------|----|---------|-------------|----|---------|--------------|----|---------|----------------|----|
| Residue | Interaction    | %  | Residue  | Interaction    | %  | Residue | Interaction | %  | Residue | Interaction  | %  | Residue | Interaction    | %  |
| Ser 115 | H-bond         | 74 | Ala 1079 | H-bond         | 40 | Glu 116 | H-bond      | 19 | Arg 101 | Pi-cation    | 69 | Thr 336 | H-bond         | 96 |
| Cys 133 | H-bond         | 54 | Glu 879  | Water bridge   | 38 |         |             |    | Tyr 142 | Water bridge | 41 | Asn 181 | Water bridge   | 74 |
| Leu 241 | H-bond         | 43 | Pro 1076 | Water bridge   | 33 |         |             |    | Arg 101 | Pi-cation    | 35 | Cys 323 | H-bond         | 70 |
| Phe 245 | Pi-pi stacking | 40 | Glu 802  | Water bridge   | 29 |         |             |    | Gln 141 | H-bond       | 32 | Phe 208 | Pi-pi stacking | 68 |
| Cys 242 | H-bond         | 32 | Glu 802  | Water bridge   | 24 |         |             |    | Glu 134 | Water bridge | 32 | Tyr 444 | Water bridge   | 68 |
| Phe 245 | Pi-pi stacking | 31 | Asn 768  | H-bond         | 23 |         |             |    | Val 110 | H-bond       | 31 | Tyr 407 | Water bridge   | 40 |
| Lys 134 | Pi-cation      | 30 | Glu 802  | H-bond         | 21 |         |             |    | Val 110 | Water bridge | 21 | Ala 111 | Water bridge   | 35 |
| Gly 158 | H-bond         | 27 | Phe 1009 | Pi-pi stacking | 16 |         |             |    | Arg 138 | Water bridge | 18 | Phe 208 | H-bond         | 34 |
| Asp 138 | Water bridge   | 26 | Phe 1009 | Pi-pi stacking | 10 |         |             |    | Val 110 | Water bridge | 18 | Ala 111 | Water bridge   | 25 |
| Pro 298 | H-bond         | 19 | Mos 1328 | H-bond         | 10 |         |             |    | Arg 101 | Water bridge | 17 | Gln 215 | Water bridge   | 19 |
| Asn 135 | Water bridge   | 15 |          |                |    |         |             |    | Asp 166 | Water bridge | 16 | Phe 208 | Water bridge   | 11 |
| Tyr 188 | Water bridge   | 15 |          |                |    |         |             |    | Tyr 142 | Water bridge | 15 | Asn 181 | Water bridge   | 11 |
| Phe 245 | Water bridge   | 14 |          |                |    |         |             |    | Arg 68  | Water bridge | 10 |         |                |    |
| Gly 158 | H-bond         | 14 |          |                |    |         |             |    | Arg 112 | Water bridge | 10 |         |                |    |
| Cys 133 | H-bond         | 13 |          |                |    |         |             |    |         |              |    |         |                |    |
| Tyr 188 | Water bridge   | 12 |          |                |    |         |             |    |         |              |    |         |                |    |
| Cys 242 | H-bond         | 10 |          |                |    |         |             |    |         |              |    |         |                |    |
| Gly 158 | Water bridge   | 10 |          |                |    |         |             |    |         |              |    |         |                |    |
